# Supplementary material for: Right hemicolectomy for mesenteric phlebosclerosis potentially caused by long-term use of herbal medicine: A case report and literature review
Source: PubMed Central journal article supplement — Int J Surg Case Rep. 2016 May 31;24:191–4. doi: 10.1016/j.ijscr.2016.05.051 (PMC4906139; doi:10.1016/j.ijscr.2016.05.051), 2016-05-31
Supplement: mmc1.pdf [file mmc1.pdf]

1  
2  
3  
4  
5  
6  
7  
8  
9  
10  
11  
12  
13  
14  
15  
16  
17  
18  
19  
20  
21  
22  
23  
24  
25  
26  
27  
28  
29  
30  
31  
32  
33  
34  
35  
36  
37  
38  
39  
40  
41  
42  
43  
44  
45  
46  
47  
48  
49

**Time line**

| <b>Dates</b> | <b>Relevant Past Medical History and Interventions</b>                                                                                                                                                                              |                                                                                                                                                                                                                                                       |                                        |
|--------------|-------------------------------------------------------------------------------------------------------------------------------------------------------------------------------------------------------------------------------------|-------------------------------------------------------------------------------------------------------------------------------------------------------------------------------------------------------------------------------------------------------|----------------------------------------|
| April 2013   | The patient was an 87-year-old woman who had worked at a pharmacy that dispensed herbal medicines. She often used several herbal medicines, such as Orenge dokuto, for 40 years.                                                    |                                                                                                                                                                                                                                                       |                                        |
| <b>Date</b>  | <b>Summaries from Initial and Follow-up Visits</b>                                                                                                                                                                                  | <b>Diagnostic Testing (including dates)</b>                                                                                                                                                                                                           | <b>Interventions</b>                   |
| April 2013   | She visited a hospital for abdominal pain and distension. Computed tomography (CT) findings suggested that she had mesenteric phlebosclerosis, and her drug history suggested long-term use of herbal medicine as a possible cause. | In May 2013, CT revealed a dilated small intestine, thickened colonic wall, luminal stenosis of the ascending colon, and serpentine calcifications alongside the colonic and mesenteric veins, extending from the ileocolic to the middle colic vein. | Ileostomy<br>Right hemicolectomy       |
| June 2015    | She had no sign of recurrence.                                                                                                                                                                                                      |                                                                                                                                                                                                                                                       | She stopped using the herbal medicine. |
|              |                                                                                                                                                                                                                                     |                                                                                                                                                                                                                                                       |                                        |
